# Supplementary figures and images for: Epilactose as a Promising Butyrate-Promoter Prebiotic via Microbiota Modulation
Source: MDPI journal article supplement (doi:10.3390/life14050643), 2024-05-18

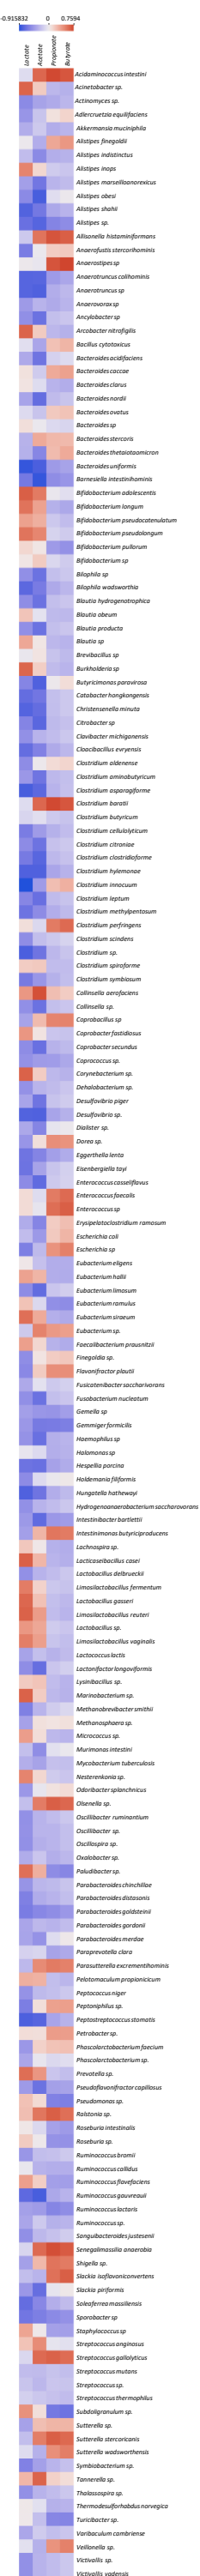

Supplement: s1 [file s1]
